# Supplementary material for: Impact of Human Papillomavirus (HPV)-6/11/16/18 Vaccine on All HPV-Associated Genital Diseases in Young Women
Source: Oxford University Press journal article supplement (doi:10.1093/jnci/djp534), 2010-02-06
Supplement: djp534_Supplementary_Data.zip [file djp534_Supplementary_Data.zip]

Archive with 1 entries (1 files):
- jnci-JNCI-09-0606-s01.pdf
