# Supplementary material for: Impact of Human Papillomavirus (HPV)-6/11/16/18 Vaccine on All HPV-Associated Genital Diseases in Young Women
Source: Oxford University Press journal article supplement (doi:10.1093/jnci/djp534), 2010-02-06
Supplement: djp534_Supplementary_Data.zip [file djp534_Supplementary_Data.zip › jnci-JNCI-09-0606-s01.pdf]

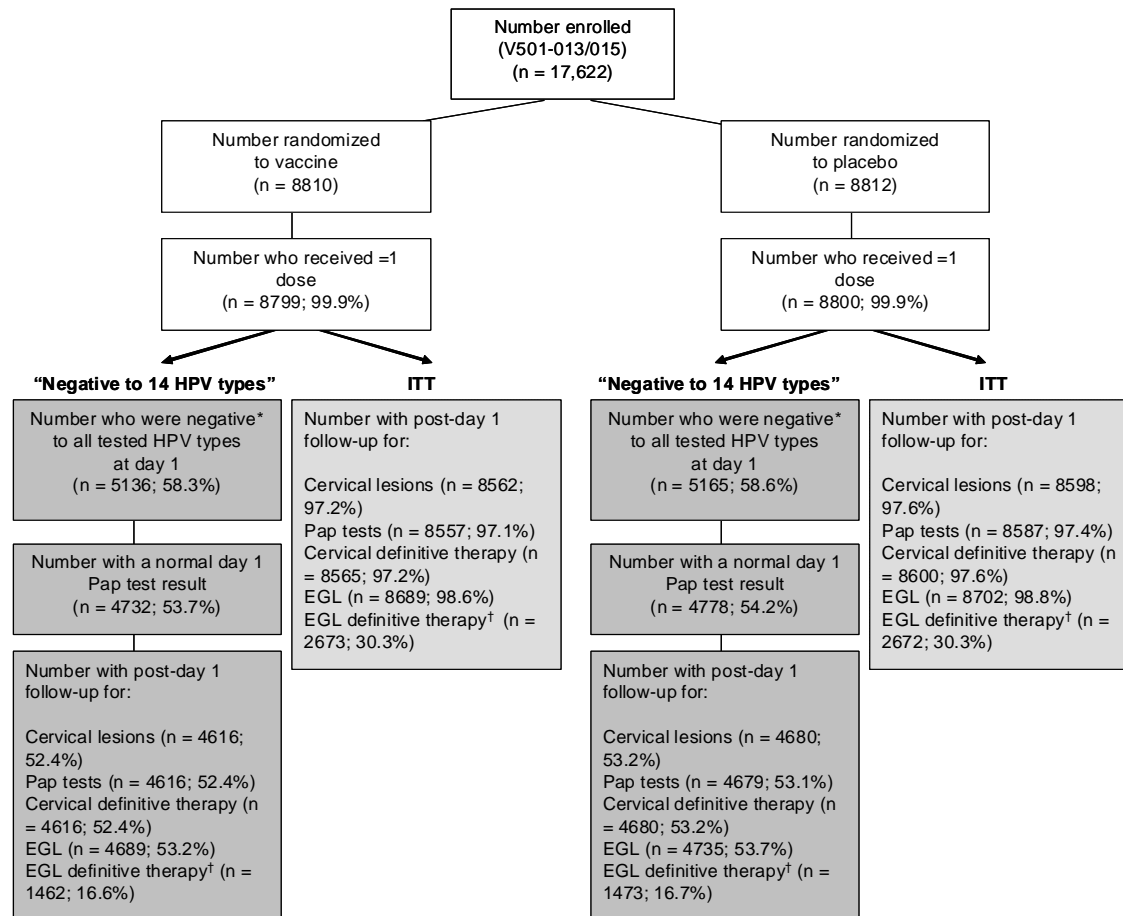

**Supplementary Figure 1.** Trial profile. EGL = external genital lesions; HPV = human papillomavirus; ITT = intention-to-treat; VIN = vulvar intraepithelial neoplasia; VaIN = vaginal intraepithelial neoplasia. \* = Seronegative and DNA negative for HPV6, 11, 16, and 18; were DNA negative to all 10 non-vaccine HPV types (including HPV 31, 33, 35, 39, 45, 51, 52, 56, 58, and 59). † = The analyses for EGL definitive therapy included Females United to Unilaterally Reduce Endo/Ectocervical Disease (FUTURE) I subjects only because treatment for VIN and VaIN were generally not recorded in FUTURE II.
